# Supplementary material
Source: PubMed Central journal article supplement (PMC9641597)
Supplement: jamapediatr-e224116-s001.pdf [file jamapediatr-e224116-s001.pdf]

## Supplementary Online Content

Madigan S, Eirich R, Pador P, McArthur BA, Neville RD. Assessment of changes in child and adolescent screen time during the COVID-19 pandemic: a systematic review and meta-analysis. *JAMA Pediatr*. Published online November 7, 2022. doi:10.1001/jamapediatrics.2022.4116

**eTable 1.** Search Strategy From Ovid MEDLINE

**eTable 2.** Quality Assessment Criteria

**eTable 3.** Quality Assessment of Included Studies

**eFigure.** Assessment of Publication Bias Using a Scatterplot of the Random-Effect Solution and the SE for Each Sample Estimate

**eReferences.**

This supplementary material has been provided by the authors to give readers additional information about their work.

**eTable 1. Search Strategy From Ovid MEDLINE**

| #  | Terms                                                                                                                                                                                                                                                                                                                                                                                                                                                                                                                                                                                                                        | Records*  |
|----|------------------------------------------------------------------------------------------------------------------------------------------------------------------------------------------------------------------------------------------------------------------------------------------------------------------------------------------------------------------------------------------------------------------------------------------------------------------------------------------------------------------------------------------------------------------------------------------------------------------------------|-----------|
| 1  | Child/exp                                                                                                                                                                                                                                                                                                                                                                                                                                                                                                                                                                                                                    | 2,051,875 |
| 2  | Adolescent/                                                                                                                                                                                                                                                                                                                                                                                                                                                                                                                                                                                                                  | 2,160,037 |
| 3  | (infan* OR newborn* OR new-born* OR neonat* OR baby* OR babies OR toddler* OR child* OR youth* OR kid* OR "young person" OR "young people" OR schoolchild* OR school-child* OR "school child*" OR boy* OR girl* OR teen* OR adolescen* OR juvenile* OR p?ediatric* OR preadolescen* OR pre-adolescen* OR "school age*" OR "school-age*" OR "preschool*" OR pre-school* OR kindergar?en OR prepubesc* OR pre-pubesc* OR "nursery school*" OR "grade school*" OR "elementary school*" OR "middle school*" OR "primary school*" OR "high school*" OR "secondary school*" OR (("day care*" or "daycare*") not adult*)).ti,ab,kw. | 3,136,243 |
| 4  | 1 OR 2 OR 3                                                                                                                                                                                                                                                                                                                                                                                                                                                                                                                                                                                                                  | 4,869,313 |
| 5  | COVID-19/                                                                                                                                                                                                                                                                                                                                                                                                                                                                                                                                                                                                                    | 141,824   |
| 6  | (2019-ncov* OR 2019ncov* OR 2019n-cov* OR coronaviru* OR corona viru* OR covid OR covid-19 OR covid19* OR ncov* OR "novel covi*" OR covid-2019 OR covid2019 OR SARS-COV-2* OR SARS-COV2* OR SARSCOV-2* OR SARSCOV2* OR SARSCOV19 OR SARS-COV-2019 OR SARSCOV2019 OR "Wuhan pneumonia" OR "Wuhan virus" OR "severe acute respiratory syndrome" OR "severe acute respiratory disease" OR lockdown* OR lock-down OR "lock down" OR "social* distanc*" OR "stay* at home" OR "stay-at-home" OR "quarantin*").ti,ab,kw.                                                                                                           | 223,829   |
| 7  | 5 OR 6                                                                                                                                                                                                                                                                                                                                                                                                                                                                                                                                                                                                                       | 229,735   |
| 8  | Sedentary Behavior/                                                                                                                                                                                                                                                                                                                                                                                                                                                                                                                                                                                                          | 12,195    |
| 9  | ("sedentary behavi?r*" OR "sedentary lifestyle*").af.                                                                                                                                                                                                                                                                                                                                                                                                                                                                                                                                                                        | 18,475    |
| 10 | Screen Time/                                                                                                                                                                                                                                                                                                                                                                                                                                                                                                                                                                                                                 | 847       |
| 11 | (screentime OR (screen* adj3 (time OR usage OR view* OR play* OR use* OR watch* OR media OR entertainment))).af.                                                                                                                                                                                                                                                                                                                                                                                                                                                                                                             | 64,532    |
| 12 | Television/                                                                                                                                                                                                                                                                                                                                                                                                                                                                                                                                                                                                                  | 13,876    |
| 13 | (television OR TV OR DVD*).af.                                                                                                                                                                                                                                                                                                                                                                                                                                                                                                                                                                                               | 37,290    |
| 14 | Computers/ OR Video Games/exp OR Internet Access/ OR Internet Use                                                                                                                                                                                                                                                                                                                                                                                                                                                                                                                                                            | 58,903    |
| 15 | (computer* OR "computer gam*" OR "video gam*" OR videogam* OR (multiplayer adj2 gam*) OR gaming OR "electronic gam*" OR exergaming OR "internet games" or "internet gaming" or (internet adj3 (access* or using* or usage or use*))).af.                                                                                                                                                                                                                                                                                                                                                                                     | 118,877   |
| 16 | Cell Phone/exp OR Mobile Applications/ OR Computers, Handheld/exp                                                                                                                                                                                                                                                                                                                                                                                                                                                                                                                                                            | 37,605    |
| 17 | ("mobile phone*" OR "smart phone*" OR "smartphone*" OR "text messag*" OR "mobile device*" OR "digital media" OR "digital technolog*" OR "media device*" OR "cell phone*" OR "cellphone*" OR iPhone* OR i-Phone* iPad* OR i-Pad* OR tablet* OR kindle OR "mobile app*" OR app OR apps OR laptop*).af.                                                                                                                                                                                                                                                                                                                         | 145,172   |
| 18 | Social Media/                                                                                                                                                                                                                                                                                                                                                                                                                                                                                                                                                                                                                | 12,648    |
| 19 | "social media".af.                                                                                                                                                                                                                                                                                                                                                                                                                                                                                                                                                                                                           | 24,036    |
| 20 | 8 OR 9 OR 10 OR 11 OR 12 OR 13 OR 14 OR 15 OR 16 OR 17 OR 18 OR 19                                                                                                                                                                                                                                                                                                                                                                                                                                                                                                                                                           | 387,591   |
| 21 | 4 AND 7 AND 20                                                                                                                                                                                                                                                                                                                                                                                                                                                                                                                                                                                                               | 1,699     |
| 22 | limit 21 to dt=20200101-20220303                                                                                                                                                                                                                                                                                                                                                                                                                                                                                                                                                                                             | 1,654     |
| 23 | limit 22 to "all child (0 to 18 years)"                                                                                                                                                                                                                                                                                                                                                                                                                                                                                                                                                                                      | 1,117     |

\*Note: Records also limited to English language sources.

| <b>eTable 2. Quality Assessment Criteria</b>                                                                                                                                                        |                                                                                                                                                       |
|-----------------------------------------------------------------------------------------------------------------------------------------------------------------------------------------------------|-------------------------------------------------------------------------------------------------------------------------------------------------------|
| <b>Criteria*</b>                                                                                                                                                                                    | <b>Question</b>                                                                                                                                       |
| <b>1</b>                                                                                                                                                                                            | Was the research question or objective clearly stated?                                                                                                |
| <b>2</b>                                                                                                                                                                                            | Was the study population clearly specified and defined?                                                                                               |
| <b>3</b>                                                                                                                                                                                            | Is the sample representative of a defined population?                                                                                                 |
| <b>4</b>                                                                                                                                                                                            | Was the participation rate of eligible subjects $\geq$ 50%?                                                                                           |
| <b>5</b>                                                                                                                                                                                            | Was a sample-size justification, power description or variance and effect estimates provided?                                                         |
| <b>6</b>                                                                                                                                                                                            | Was the timeframe sufficient so that one could reasonably expect to see an association between exposure and outcome if it existed?                    |
| <b>7</b>                                                                                                                                                                                            | For outcomes that can vary in amount, type, or level, did the study report on such differences?                                                       |
| <b>8</b>                                                                                                                                                                                            | Were the outcome measures (dependent variables) clearly defined, valid, reliable, and implemented consistently across all study participants?         |
| <b>9</b>                                                                                                                                                                                            | Were the outcomes (dependent variables) assessed using objective measures?                                                                            |
| <b>10</b>                                                                                                                                                                                           | Was loss to follow-up after baseline measurement $\leq$ 20%?                                                                                          |
| <b>11</b>                                                                                                                                                                                           | Were key potential confounding variables measured and adjusted statistically for their impact on the relationship between exposure(s) and outcome(s)? |
| *For each criterion, studies were given a score of 0 (criterion unmet) or 1 (criteria met). When data was not reported in a study to score a criterion, it was marked as 0 (i.e., criterion unmet). |                                                                                                                                                       |

**eTable 3.** Quality Assessment of Included Studies

| Study Author, Year                          | Quality Criteria |   |   |   |   |   |   |   |   |    |    | Total (0-11) |
|---------------------------------------------|------------------|---|---|---|---|---|---|---|---|----|----|--------------|
|                                             | 1                | 2 | 3 | 4 | 5 | 6 | 7 | 8 | 9 | 10 | 11 |              |
| Aguilar-Farias et al, 2021 <sup>1</sup>     | 1                | 1 | 0 | 0 | 0 | 0 | 0 | 1 | 0 | 0  | 1  | 4            |
| Beck et al, 2021 <sup>2</sup>               | 1                | 1 | 0 | 1 | 0 | 0 | 0 | 1 | 0 | 0  | 0  | 4            |
| Brzęk et al, 2021 <sup>3</sup>              | 1                | 1 | 1 | 0 | 0 | 1 | 1 | 0 | 0 | 0  | 1  | 6            |
| Burkart et al, 2022 <sup>4</sup>            | 1                | 1 | 1 | 0 | 0 | 1 | 1 | 1 | 1 | 1  | 1  | 9            |
| Cardy et al, 2021 <sup>5</sup>              | 1                | 1 | 1 | 1 | 0 | 1 | 1 | 1 | 0 | 1  | 1  | 9            |
| Chen et al, 2021 <sup>6</sup>               | 1                | 1 | 1 | 1 | 0 | 1 | 1 | 1 | 0 | 1  | 1  | 9            |
| Cheng et al, 2021 <sup>7</sup>              | 1                | 1 | 1 | 1 | 0 | 1 | 1 | 1 | 0 | 1  | 1  | 9            |
| Eales et al, 2021 <sup>8</sup>              | 1                | 1 | 1 | 1 | 0 | 1 | 0 | 1 | 0 | 1  | 1  | 8            |
| Garcia et al, 2021 <sup>9</sup>             | 1                | 0 | 0 | 0 | 0 | 0 | 1 | 1 | 0 | 0  | 1  | 4            |
| Ghanamah et al, 2021 <sup>10</sup>          | 1                | 1 | 1 | 1 | 0 | 1 | 0 | 1 | 0 | 1  | 1  | 8            |
| Hossain et al, 2021 <sup>11</sup>           | 1                | 1 | 1 | 0 | 0 | 1 | 1 | 0 | 0 | 1  | 0  | 6            |
| Hu et al, 2021 <sup>12</sup>                | 1                | 1 | 1 | 0 | 0 | 1 | 1 | 1 | 0 | 0  | 1  | 7            |
| Jáuregui et al, 2021 <sup>13</sup>          | 1                | 0 | 0 | 0 | 0 | 0 | 1 | 1 | 0 | 0  | 1  | 4            |
| Jia et al, 2021 <sup>14</sup>               | 1                | 0 | 0 | 0 | 0 | 0 | 1 | 1 | 0 | 0  | 1  | 4            |
| Kim et al, 2021a <sup>15</sup>              | 1                | 1 | 1 | 0 | 0 | 1 | 1 | 1 | 1 | 1  | 0  | 8            |
| Kim et al, 2021b <sup>16</sup>              | 1                | 1 | 0 | 0 | 0 | 1 | 1 | 1 | 0 | 1  | 0  | 6            |
| López Gil et al, 2021 <sup>17</sup>         | 1                | 0 | 0 | 0 | 0 | 1 | 0 | 0 | 0 | 0  | 1  | 3            |
| López-Bueno et al, 2020 <sup>18</sup>       | 1                | 1 | 0 | 0 | 0 | 1 | 0 | 0 | 0 | 0  | 1  | 3            |
| Ma et al, 2021 <sup>19</sup>                | 1                | 1 | 1 | 1 | 0 | 1 | 1 | 1 | 0 | 1  | 1  | 9            |
| Maheux et al, 2021 <sup>20</sup>            | 1                | 1 | 1 | 1 | 0 | 1 | 0 | 1 | 0 | 1  | 1  | 8            |
| Maltoni et al, 2021 <sup>21</sup>           | 1                | 1 | 0 | 1 | 0 | 1 | 1 | 1 | 0 | 1  | 1  | 8            |
| McArthur et al, 2021 <sup>22</sup>          | 1                | 1 | 1 | 1 | 0 | 1 | 0 | 1 | 0 | 0  | 1  | 7            |
| Medrano et al, 2021 <sup>23</sup>           | 1                | 1 | 1 | 1 | 1 | 1 | 0 | 1 | 0 | 0  | 1  | 8            |
| Mirhajianmoghadam et al, 2021 <sup>24</sup> | 1                | 1 | 0 | 0 | 0 | 1 | 1 | 1 | 1 | 0  | 1  | 7            |
| Mohan et al, 2021 <sup>25</sup>             | 1                | 1 | 0 | 1 | 0 | 0 | 1 | 1 | 0 | 0  | 1  | 6            |
| Moore et al, 2021 <sup>26</sup>             | 1                | 1 | 1 | 0 | 1 | 1 | 1 | 1 | 0 | 0  | 1  | 8            |
| Morrison et al, 2021 <sup>27</sup>          | 1                | 1 | 1 | 0 | 0 | 1 | 0 | 1 | 0 | 1  | 1  | 7            |
| Nathan et al, 2021 <sup>28</sup>            | 1                | 1 | 1 | 0 | 0 | 0 | 1 | 1 | 0 | 0  | 1  | 6            |
| Ng et al, 2021 <sup>29</sup>                | 1                | 1 | 1 | 0 | 0 | 1 | 1 | 1 | 1 | 0  | 0  | 7            |
| Nyström et al, 2020 <sup>30</sup>           | 1                | 1 | 1 | 1 | 0 | 1 | 0 | 1 | 0 | 1  | 0  | 7            |
| Okely et al, 2021 <sup>31</sup>             | 1                | 1 | 1 | 1 | 1 | 1 | 1 | 1 | 0 | 0  | 1  | 9            |
| Ostermeier et al, 2021 <sup>32</sup>        | 1                | 1 | 1 | 0 | 0 | 1 | 1 | 1 | 0 | 0  | 1  | 7            |
| Peddie et al, 2021 <sup>33</sup>            | 1                | 1 | 1 | 0 | 1 | 1 | 1 | 0 | 0 | 1  | 0  | 7            |

|                                        |   |   |   |   |   |   |   |   |   |   |   |   |
|----------------------------------------|---|---|---|---|---|---|---|---|---|---|---|---|
| Pietrobelli et al, 2021 <sup>34</sup>  | 1 | 1 | 0 | 1 | 1 | 1 | 0 | 0 | 0 | 1 | 0 | 6 |
| Rebelo et al, 2021 <sup>35</sup>       | 1 | 0 | 0 | 1 | 0 | 0 | 0 | 1 | 0 | 1 | 1 | 5 |
| Ribner et al, 2021 <sup>36</sup>       | 1 | 1 | 1 | 1 | 0 | 1 | 1 | 1 | 0 | 1 | 1 | 9 |
| Saxena et al, 2021 <sup>37</sup>       | 1 | 1 | 1 | 1 | 0 | 1 | 1 | 1 | 0 | 1 | 1 | 9 |
| Schnaiderman et al, 2021 <sup>38</sup> | 1 | 0 | 0 | 0 | 0 | 1 | 1 | 1 | 0 | 0 | 0 | 4 |
| Schmidt et al, 2021 <sup>39</sup>      | 1 | 1 | 0 | 0 | 0 | 1 | 1 | 1 | 0 | 1 | 1 | 7 |
| Seo et al, 2021 <sup>40</sup>          | 1 | 1 | 0 | 0 | 0 | 1 | 1 | 1 | 0 | 1 | 1 | 7 |
| Shoshani et al, 2021 <sup>41</sup>     | 1 | 1 | 1 | 1 | 0 | 1 | 1 | 1 | 0 | 1 | 1 | 9 |
| ten Velde et al, 2021 <sup>42</sup>    | 1 | 1 | 1 | 0 | 0 | 1 | 1 | 1 | 1 | 1 | 0 | 8 |
| Welling et al, 2022 <sup>43</sup>      | 1 | 1 | 1 | 0 | 0 | 1 | 0 | 1 | 0 | 1 | 1 | 7 |
| Xiang et al, 2020 <sup>44</sup>        | 1 | 1 | 1 | 0 | 0 | 1 | 0 | 1 | 0 | 0 | 0 | 5 |
| Yum et al, 2021 <sup>45</sup>          | 1 | 1 | 0 | 1 | 0 | 1 | 1 | 1 | 0 | 1 | 1 | 8 |
| Zhang et al, 2021 <sup>46</sup>        | 1 | 1 | 0 | 1 | 0 | 1 | 1 | 1 | 0 | 1 | 1 | 8 |

**eFigure.** Assessment of Publication Bias Using a Scatterplot of the Random-Effect Solution and the SE for Each Sample Estimate

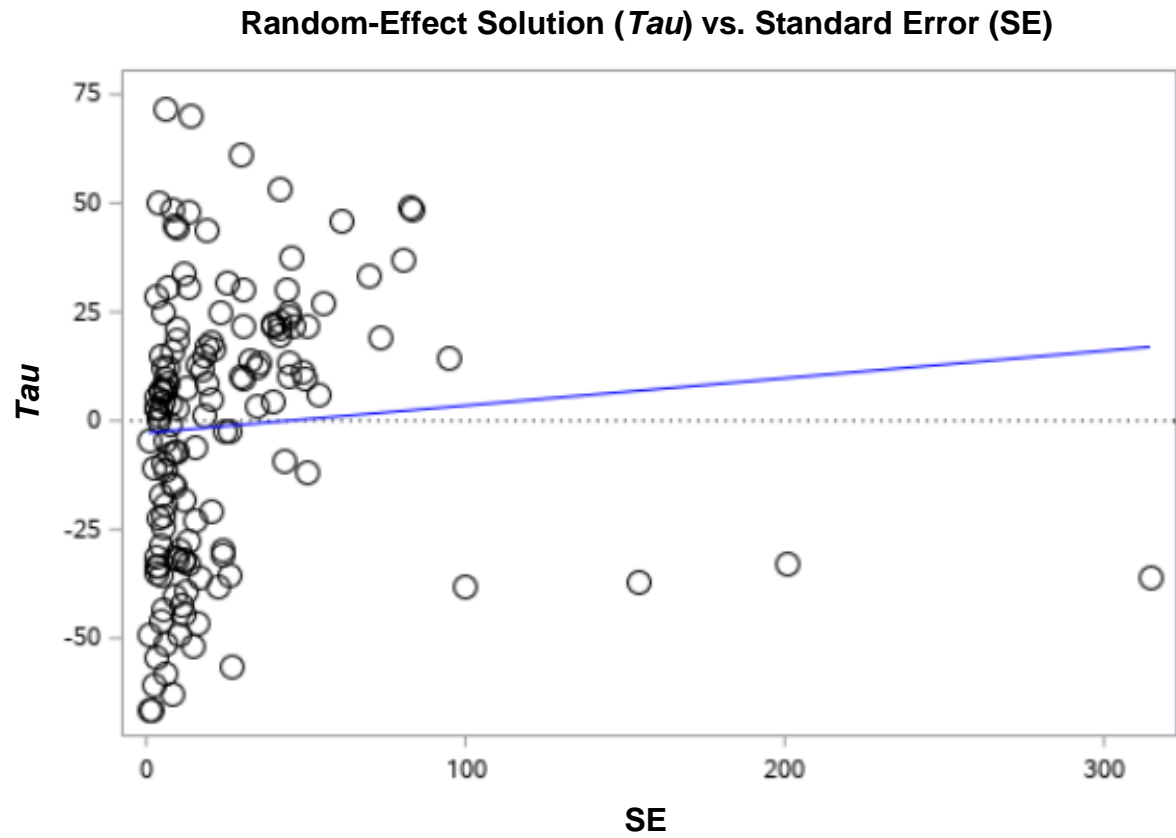

**eReferences.**

1. Aguilar-Farias N, Toledo-Vargas M, Miranda-Marquez S, et al. Sociodemographic predictors of changes in physical activity, screen time, and sleep among toddlers and preschoolers in Chile during the COVID-19 pandemic. *International Journal of Environmental Research and Public Health*. 2021;18(1):1-13.
2. Beck AL, Huang JC, Lenzion L, Fernandez A, Martinez S. Impact of the Coronavirus Disease 2019 Pandemic on Parents' Perception of Health Behaviors in Children With Overweight and Obesity. *Academic Pediatrics*. 2021;21(8):1434-1440.
3. Brzęk A, Strauss M, Sanchis-Gomar F, Leischik R. Physical activity, screen time, sedentary and sleeping habits of Polish preschoolers during the COVID-19 pandemic and WHO's recommendations: An observational cohort study. *International Journal of Environmental Research and Public Health*. 2021;18(21).
4. Burkart S, Parker H, Weaver RG, et al. Impact of the COVID-19 pandemic on elementary schoolers' physical activity, sleep, screen time and diet: A quasi-experimental interrupted time series study. *Pediatric Obesity*. 2022;17(1).
5. Cardy RE, Dupuis A, Anagnostou E, et al. Characterizing Changes in Screen Time During the COVID-19 Pandemic School Closures in Canada and Its Perceived Impact on Children With Autism Spectrum Disorder. *Frontiers in Psychiatry*. 2021;12.
6. Chen IH, Chen CY, Pakpour AH, et al. Problematic internet-related behaviors mediate the associations between levels of internet engagement and distress among schoolchildren during COVID-19 lockdown: A longitudinal structural equation modeling study. *Journal of Behavioral Addictions*. 2021;10(1):135-148.
7. Cheng HP, Wong JSL, Selveindran NM, Hong JYH. Impact of COVID-19 lockdown on glycaemic control and lifestyle changes in children and adolescents with type 1 and type 2 diabetes mellitus. *Endocrine*. 2021;73(3):499-506.
8. Eales L, Gillespie S, Alstat RA, Ferguson GM, Carlson SM. Children's screen and problematic media use in the United States before and during the COVID-19 pandemic. *Child development*. 2021;92(5):e866-e882.

9. Garcia JM, Lawrence S, Brazendale K, Leahy N, Fukuda D. Brief report: The impact of the COVID-19 pandemic on health behaviors in adolescents with Autism Spectrum Disorder. *Disability and Health Journal*. 2021;14(2).
10. Ghanamah R, Eghbaria-Ghanamah H. Impact of covid-19 pandemic on behavioral and emotional aspects and daily routines of Arab israeli children. *International Journal of Environmental Research and Public Health*. 2021;18(6):1-19.
11. Hossain MS, Deeba IM, Hasan M, et al. International study of 24-h movement behaviors of early years (SUNRISE): a pilot study from Bangladesh. *Pilot and Feasibility Studies*. 2021;7(1).
12. Hu P, Samuels S, Maciejewski KR, et al. Changes in Weight-Related Health Behaviors and Social Determinants of Health among Youth with Overweight/Obesity during the COVID-19 Pandemic. *Childhood Obesity*. 2021.
13. Jáuregui A, Argumedo G, Medina C, Bonvecchio-Arenas A, Romero-Martínez M, Okely AD. Factors associated with changes in movement behaviors in toddlers and preschoolers during the COVID-19 pandemic: A national cross-sectional study in Mexico. *Prev Med Rep*. 2021;24.
14. Jia P, Zhang L, Yu W, et al. Impact of COVID-19 lockdown on activity patterns and weight status among youths in China: the COVID-19 Impact on Lifestyle Change Survey (COINLICS). *International journal of obesity (2005)*. 2021;45(3):695-699.
15. Hyunshik K, Jiameng M, Sunkyoung L, Ying G. Change in Japanese children's 24-hour movement guidelines and mental health during the COVID-19 pandemic. *Scientific reports*. 2021;11(1):22972.
16. Kim H, Ma J, Kim J, Xu D, Lee S. Changes in Adherence to the 24-Hour Movement Guidelines and Overweight and Obesity among Children in Northeastern Japan: A Longitudinal Study before and during the COVID-19 Pandemic. *Obesities*. 2021;1(3):167-177.
17. López-Gil JF, Tremblay MS, Brazo-Sayavera J. Changes in Healthy Behaviors and Meeting 24-h Movement Guidelines in Spanish and Brazilian Preschoolers, Children and Adolescents during the COVID-19 Lockdown. *Children*. 2021;8(2).
18. López-Bueno R, López-Sánchez GF, Casajús JA, et al. Health-Related Behaviors Among School-Aged Children and Adolescents During the Spanish Covid-19 Confinement. *Frontiers in Pediatrics*. 2020;8.



19. Ma D, Wei S, Li SM, et al. Progression of myopia in a natural cohort of Chinese children during COVID-19 pandemic. *Graefe's Archive for Clinical and Experimental Ophthalmology*. 2021;259(9):2813-2820.
20. Maheux AJ, Nesi J, Galla BM, Roberts SR, Choukas-Bradley S. #Grateful: Longitudinal Associations Between Adolescents' Social Media Use and Gratitude During the COVID-19 Pandemic. *Journal of research on adolescence : the official journal of the Society for Research on Adolescence*. 2021;31(3):734-747.
21. Maltoni G, Zioutas M, Deiana G, Biserni GB, Pession A, Zucchini S. Gender differences in weight gain during lockdown due to COVID-19 pandemic in adolescents with obesity. *Nutrition, Metabolism and Cardiovascular Diseases*. 2021;31(7):2181-2185.
22. McArthur BA, Racine N, Browne D, McDonald S, Tough S, Madigan S. Recreational screen time before and during COVID-19 in school-aged children. *Acta Paediatrica*. 2021;110(10):2805-2807.
23. Medrano M, Cadenas-Sanchez C, Osés M, Arenaza L, Amasene M, Labayen I. Changes in lifestyle behaviours during the COVID-19 confinement in Spanish children: A longitudinal analysis from the MUGI project. *Pediatric Obesity*. 2021;16(4).
24. Mirhajianmoghadam H, Piña A, Ostrin LA. Objective and Subjective Behavioral Measures in Myopic and Non-Myopic Children During the COVID-19 Pandemic. *Translational Vision Science & Technology*. 2021;10(11):4-4.
25. Mohan A, Sen P, Shah C, Jain E, Jain S. Prevalence and risk factor assessment of digital eye strain among children using online e-learning during the COVID-19 pandemic: Digital eye strain among kids (DESK study-1). *Indian journal of ophthalmology*. 2021;69(1):140-144.
26. Moore SA, Faulkner G, Rhodes RE, et al. Impact of the COVID-19 virus outbreak on movement and play behaviours of Canadian children and youth: A national survey. *International Journal of Behavioral Nutrition and Physical Activity*. 2020;17(1).
27. Morrison SA, Meh K, Sember V, Starc G, Jurak G. The Effect of Pandemic Movement Restriction Policies on Children's Physical Fitness, Activity, Screen Time, and Sleep. *Frontiers in public health*. 2021;9(101616579):785679.

28. Nathan A, George P, Ng M, et al. Impact of covid-19 restrictions on western Australian children's physical activity and screen time. *International Journal of Environmental Research and Public Health*. 2021;18(5):1-13.
29. Ng JYY, He Q, Chong KH, Okely AD, Chan CHS, Ha AS. The impact of covid-19 on preschool-aged children's movement behaviors in Hong Kong: A longitudinal analysis of accelerometer-measured data. *International Journal of Environmental Research and Public Health*. 2021;18(22).
30. Delisle Nyström C, Alexandrou C, Henström M, et al. International Study of Movement Behaviors in the Early Years (SUNRISE): Results from SUNRISE Sweden's Pilot and COVID-19 Study. *International Journal of Environmental Research and Public Health*. 2020;17(22).
31. Okely AD, Kariippanon KE, Guan H, et al. Global effect of COVID-19 pandemic on physical activity, sedentary behaviour and sleep among 3- to 5-year-old children: a longitudinal study of 14 countries. *BMC public health*. 2021;21(1):940.
32. Ostermeier E, Tucker P, Clark A, Seabrook JA, Gilliland J. Parents' report of canadian elementary school children's physical activity and screen time during the COVID-19 pandemic: A longitudinal study. *International Journal of Environmental Research and Public Health*. 2021;18(23).
33. Peddie MC, Scott T, Haszard JJ. Using a 24 h activity recall (Star-24) to describe activity in adolescent boys in new zealand: Comparisons between a sample collected before, and a sample collected during the covid-19 lockdown. *International Journal of Environmental Research and Public Health*. 2021;18(15).
34. Pietrobelli A, Fearnbach N, Ferruzzi A, et al. Effects of COVID-19 lockdown on lifestyle behaviors in children with obesity: Longitudinal study update. *Obesity Science and Practice*. 2021((Pietrobelli A.; Ferruzzi A.; Vrech M.; Pecoraro L.; Zoller T.; Antoniazzi F.; Piacentini G.) Department of Surgical Science, Dentistry, Gynecology and Pediatrics, Pediatric Unit, Verona University Medical School, Verona, Italy(Pietrobelli A.; Fearnbach N).
35. Rebelo AT, Pinto DH, Cunha R, et al. Impact of one-year pandemic on children with autism spectrum disorder. *Cogent Medicine*. 2021;8((Rebelo A.T.; Pinto D.H.; Cunha R.; Monteiro D.R.; Sá L.; Monteiro V.; Monteiro J.) Centro Hospitalar Entre O Douro e Vouga, Paediatrics, Santa Maria Da Feira, Portugal).

36. Ribner AD, Coulanges L, Friedman S, et al. Screen Time in the Coronavirus 2019 Era: International Trends of Increasing Use Among 3- to 7-Year-Old Children. *Journal of Pediatrics*. 2021;239:59-66.e51.
37. Saxena R, Gupta V, Rakheja V, Dhiman R, Bhardawaj A, Vashist P. Lifestyle modification in school-going children before and after COVID-19 lockdown. *Indian journal of ophthalmology*. 2021;69(12):3623-3629.
38. Schnaiderman D, Bailac M, Borak L, et al. Psychological impact of COVID-19 lockdown in children and adolescents from San Carlos de Bariloche, Argentina: Parents' perspective. *Archivos argentinos de pediatria*. 2021;119(3):170-176.
39. Schmidt SCE, Anedda B, Burchartz A, et al. Physical activity and screen time of children and adolescents before and during the COVID-19 lockdown in Germany: a natural experiment. *Scientific reports*. 2020;10(1):21780.
40. Seo HR, Jung HS, Jung DS, Choi JW, Jo SH. Acute impact of the coronavirus disease outbreak on behavioral patterns and emotional states of pediatric psychiatric patients and caregivers in Daegu, South Korea. *Psychiatry Investigation*. 2021;18(9):913-922.
41. Shoshani A, Kor A. The mental health effects of the COVID-19 pandemic on children and adolescents: Risk and protective factors. *Psychological Trauma: Theory, Research, Practice, and Policy*. 2021.
42. ten Velde G, Lubrecht J, Arayess L, et al. Physical activity behaviour and screen time in Dutch children during the COVID-19 pandemic: Pre-, during- and post-school closures. *Pediatric Obesity*. 2021;16(9).
43. Welling MS, Abawi O, Van Den Eynde E, et al. Impact of the COVID-19 pandemic and related lockdown measures on lifestyle behaviors and wellbeing in children and adolescents with severe obesity. *Obesity Facts*. 2021.
44. Xiang M, Zhang Z, Kuwahara K. Impact of COVID-19 pandemic on children and adolescents' lifestyle behavior larger than expected. *Progress in Cardiovascular Diseases*. 2020;63(4):531-532.
45. Yum HR, Park SH, Shin SY. Influence of coronavirus disease 2019 on myopic progression in children treated with low-concentration atropine. *PLoS ONE*. 2021;16(9 September 2021).

46. Zhang X, Cheung SSL, Chan HN, et al. Myopia incidence and lifestyle changes among school children during the COVID-19 pandemic: A population-based prospective study. *British Journal of Ophthalmology*. 2021.
